# Supplementary material
Source: PubMed Central journal article supplement (PMC3448776)

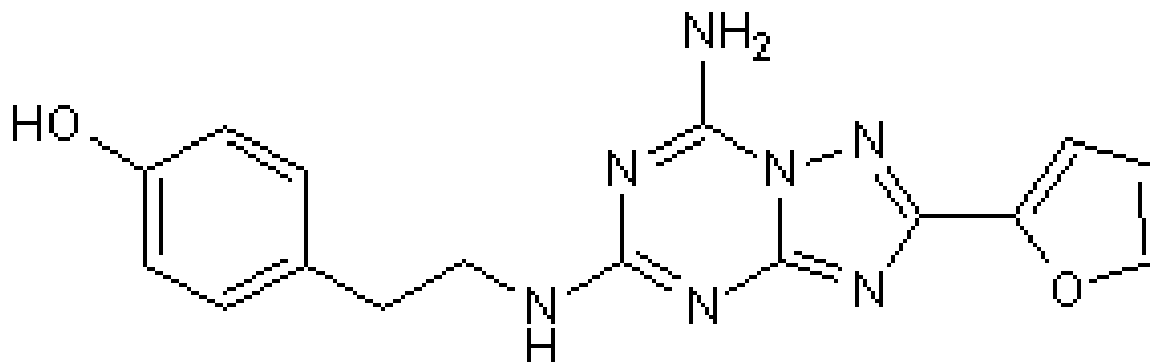

ZM241385;

Chemical Name: 4-(2-[7-Amino-2-(2-furyl)[1,2,4]triazolo[2,3-*a*][1,3,5]triazin-5-ylamino]ethyl)phenol.

***Supplemental figure 1***

Supplement: supp_fj.12-209627_12-209627SuppFigure1.pdf [file supp_fj.12-209627_12-209627SuppFigure1.pdf]
